# Supplementary material for: sox4 And sox11 Function during Xenopus laevis Eye Development
Source: PubMed Central journal article supplement (PMC3715537; doi:10.1371/journal.pone.0069372), 2013-07-18
Supplement: pone.0069372.s002.pdf [file pone.0069372.s002.pdf]

**A**

**sox4 MO binding sites:**

*xsox4* 5'-GTAGCTAAACAGCAGCAGCAATCGT-3'  
*hSOX4* 5'-ATCGATTCGAATTCGCCCTTATGGT-3'

green = start codon

red = different sequence

**B**

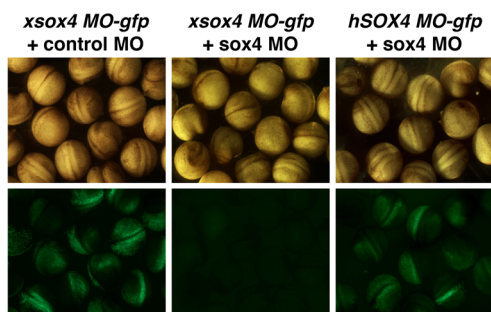

**C**

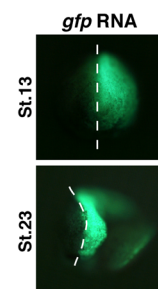

Cizelsky/Hempel et al., Figure S2
