# Supplementary material for: sox4 And sox11 Function during Xenopus laevis Eye Development
Source: PubMed Central journal article supplement (PMC3715537; doi:10.1371/journal.pone.0069372), 2013-07-18
Supplement: pone.0069372.s003.pdf [file pone.0069372.s003.pdf]

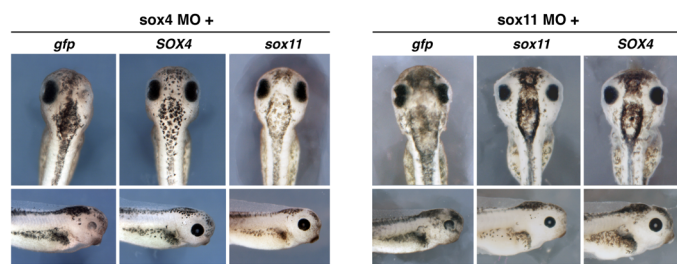

Cizelsky/Hempel et al., Figure S3
